# Supplementary material for: The impact of measles immunization campaigns in India using a nationally representative sample of 27,000 child deaths
Source: eLife journal article supplement (doi:10.7554/elife.43290), 2019-03-04
Supplement: supp [file elife-43290-supp-v1.zip]

Archive with 10 entries (10 files):
- elife_poa_e43290_Figure_3_source_data_1.csv
- elife_poa_e43290_Table_1_source_data_1.csv
- elife_poa_e43290_Figure_4_source_data_1.csv
- elife_poa_e43290_Transparent_Reporting_File.pdf
- elife_poa_e43290_Figure_1_figure_supplement_1_source_data_1.csv
- elife_poa_e43290_Figure_1_figure_supplement_1.pdf
- elife_poa_e43290_Figure_1_figure_supplement_2.pdf
- elife_poa_e43290_Table_2_source_data_1.csv
- elife_poa_e43290_Figure_1_source_data_1.csv
- elife_poa_e43290_Figure_2_source_data_1.csv
