# Supplementary material for: The impact of measles immunization campaigns in India using a nationally representative sample of 27,000 child deaths
Source: eLife journal article supplement (doi:10.7554/elife.43290), 2019-03-04
Supplement: supp [file elife-43290-supp-v1.zip › elife_poa_e43290_Figure_1_figure_supplement_1_source_data_1.csv]

survey_year	state_code	meas_sia_state	deaths
2005	Jammu & Kashmir	Non-SIA State	1 to 6
2005	Himachal Pradesh	Non-SIA State	1 to 6
2005	Punjab	Non-SIA State	1 to 6
2005	Chandigarh	Non-SIA State	No Deaths
2005	Uttarakhand	Non-SIA State	1 to 6
2005	Haryana	SIA State	1 to 6
2005	Delhi	Non-SIA State	1 to 6
2005	Rajasthan	SIA State	15 to 60
2005	Uttar Pradesh	SIA State	15 to 60
2005	Bihar	SIA State	15 to 60
2005	Sikkim	Non-SIA State	1 to 6
2005	Arunachal Pradesh	SIA State	1 to 6
2005	Nagaland	SIA State	1 to 6
2005	Manipur	SIA State	1 to 6
2005	Mizoram	Non-SIA State	No Deaths
2005	Tripura	SIA State	No Deaths
2005	Meghalaya	SIA State	7 to 14
2005	Assam	SIA State	7 to 14
2005	West Bengal	Non-SIA State	7 to 14
2005	Jharkhand	SIA State	1 to 6
2005	Odisha	Non-SIA State	7 to 14
2005	Chhattisgarh	SIA State	1 to 6
2005	Madhya Pradesh	SIA State	15 to 60
2005	Gujarat	SIA State	7 to 14
2005	Daman & Diu	Non-SIA State	No Deaths
2005	Dadra & Nagar Haveli	Non-SIA State	1 to 6
2005	Maharashtra	Non-SIA State	7 to 14
2005	Andhra Pradesh	Non-SIA State	1 to 6
2005	Karnataka	Non-SIA State	1 to 6
2005	Goa	Non-SIA State	No Deaths
2005	Lakshadweep	Non-SIA State	1 to 6
2005	Kerala	Non-SIA State	1 to 6
2005	Tamil Nadu	Non-SIA State	7 to 14
2005	Puducherry	Non-SIA State	No Deaths
2005	Andaman & Nicobar Islands	Non-SIA State	1 to 6
2006	Jammu & Kashmir	Non-SIA State	1 to 6
2006	Himachal Pradesh	Non-SIA State	1 to 6
2006	Punjab	Non-SIA State	1 to 6
2006	Chandigarh	Non-SIA State	No Deaths
2006	Uttarakhand	Non-SIA State	No Deaths
2006	Haryana	SIA State	1 to 6
2006	Delhi	Non-SIA State	1 to 6
2006	Rajasthan	SIA State	15 to 60
2006	Uttar Pradesh	SIA State	60+
2006	Bihar	SIA State	15 to 60
2006	Sikkim	Non-SIA State	No Deaths
2006	Arunachal Pradesh	SIA State	1 to 6
2006	Nagaland	SIA State	1 to 6
2006	Manipur	SIA State	No Deaths
2006	Mizoram	Non-SIA State	No Deaths
2006	Tripura	SIA State	No Deaths
2006	Meghalaya	SIA State	1 to 6
2006	Assam	SIA State	1 to 6
2006	West Bengal	Non-SIA State	7 to 14
2006	Jharkhand	SIA State	1 to 6
2006	Odisha	Non-SIA State	7 to 14
2006	Chhattisgarh	SIA State	1 to 6
2006	Madhya Pradesh	SIA State	15 to 60
2006	Gujarat	SIA State	15 to 60
2006	Daman & Diu	Non-SIA State	No Deaths
2006	Dadra & Nagar Haveli	Non-SIA State	1 to 6
2006	Maharashtra	Non-SIA State	1 to 6
2006	Andhra Pradesh	Non-SIA State	1 to 6
2006	Karnataka	Non-SIA State	7 to 14
2006	Goa	Non-SIA State	1 to 6
2006	Lakshadweep	Non-SIA State	No Deaths
2006	Kerala	Non-SIA State	No Deaths
2006	Tamil Nadu	Non-SIA State	1 to 6
2006	Puducherry	Non-SIA State	No Deaths
2006	Andaman & Nicobar Islands	Non-SIA State	No Deaths
2007	Jammu & Kashmir	Non-SIA State	1 to 6
2007	Himachal Pradesh	Non-SIA State	No Deaths
2007	Punjab	Non-SIA State	7 to 14
2007	Chandigarh	Non-SIA State	1 to 6
2007	Uttarakhand	Non-SIA State	1 to 6
2007	Haryana	SIA State	1 to 6
2007	Delhi	Non-SIA State	1 to 6
2007	Rajasthan	SIA State	7 to 14
2007	Uttar Pradesh	SIA State	15 to 60
2007	Bihar	SIA State	15 to 60
2007	Sikkim	Non-SIA State	1 to 6
2007	Arunachal Pradesh	SIA State	1 to 6
2007	Nagaland	SIA State	1 to 6
2007	Manipur	SIA State	1 to 6
2007	Mizoram	Non-SIA State	No Deaths
2007	Tripura	SIA State	1 to 6
2007	Meghalaya	SIA State	1 to 6
2007	Assam	SIA State	1 to 6
2007	West Bengal	Non-SIA State	7 to 14
2007	Jharkhand	SIA State	No Deaths
2007	Odisha	Non-SIA State	7 to 14
2007	Chhattisgarh	SIA State	1 to 6
2007	Madhya Pradesh	SIA State	15 to 60
2007	Gujarat	SIA State	15 to 60
2007	Daman & Diu	Non-SIA State	No Deaths
2007	Dadra & Nagar Haveli	Non-SIA State	1 to 6
2007	Maharashtra	Non-SIA State	1 to 6
2007	Andhra Pradesh	Non-SIA State	7 to 14
2007	Karnataka	Non-SIA State	7 to 14
2007	Goa	Non-SIA State	1 to 6
2007	Lakshadweep	Non-SIA State	No Deaths
2007	Kerala	Non-SIA State	No Deaths
2007	Tamil Nadu	Non-SIA State	1 to 6
2007	Puducherry	Non-SIA State	No Deaths
2007	Andaman & Nicobar Islands	Non-SIA State	No Deaths
2008	Jammu & Kashmir	Non-SIA State	No Deaths
2008	Himachal Pradesh	Non-SIA State	1 to 6
2008	Punjab	Non-SIA State	7 to 14
2008	Chandigarh	Non-SIA State	No Deaths
2008	Uttarakhand	Non-SIA State	1 to 6
2008	Haryana	SIA State	1 to 6
2008	Delhi	Non-SIA State	1 to 6
2008	Rajasthan	SIA State	15 to 60
2008	Uttar Pradesh	SIA State	15 to 60
2008	Bihar	SIA State	1 to 6
2008	Sikkim	Non-SIA State	1 to 6
2008	Arunachal Pradesh	SIA State	1 to 6
2008	Nagaland	SIA State	No Deaths
2008	Manipur	SIA State	No Deaths
2008	Mizoram	Non-SIA State	1 to 6
2008	Tripura	SIA State	1 to 6
2008	Meghalaya	SIA State	1 to 6
2008	Assam	SIA State	7 to 14
2008	West Bengal	Non-SIA State	1 to 6
2008	Jharkhand	SIA State	1 to 6
2008	Odisha	Non-SIA State	7 to 14
2008	Chhattisgarh	SIA State	1 to 6
2008	Madhya Pradesh	SIA State	15 to 60
2008	Gujarat	SIA State	15 to 60
2008	Daman & Diu	Non-SIA State	1 to 6
2008	Dadra & Nagar Haveli	Non-SIA State	No Deaths
2008	Maharashtra	Non-SIA State	1 to 6
2008	Andhra Pradesh	Non-SIA State	1 to 6
2008	Karnataka	Non-SIA State	1 to 6
2008	Goa	Non-SIA State	No Deaths
2008	Lakshadweep	Non-SIA State	No Deaths
2008	Kerala	Non-SIA State	No Deaths
2008	Tamil Nadu	Non-SIA State	1 to 6
2008	Puducherry	Non-SIA State	No Deaths
2008	Andaman & Nicobar Islands	Non-SIA State	No Deaths
2009	Jammu & Kashmir	Non-SIA State	1 to 6
2009	Himachal Pradesh	Non-SIA State	1 to 6
2009	Punjab	Non-SIA State	7 to 14
2009	Chandigarh	Non-SIA State	1 to 6
2009	Uttarakhand	Non-SIA State	15 to 60
2009	Haryana	SIA State	1 to 6
2009	Delhi	Non-SIA State	1 to 6
2009	Rajasthan	SIA State	15 to 60
2009	Uttar Pradesh	SIA State	15 to 60
2009	Bihar	SIA State	60+
2009	Sikkim	Non-SIA State	No Deaths
2009	Arunachal Pradesh	SIA State	1 to 6
2009	Nagaland	SIA State	No Deaths
2009	Manipur	SIA State	No Deaths
2009	Mizoram	Non-SIA State	1 to 6
2009	Tripura	SIA State	1 to 6
2009	Meghalaya	SIA State	1 to 6
2009	Assam	SIA State	1 to 6
2009	West Bengal	Non-SIA State	7 to 14
2009	Jharkhand	SIA State	15 to 60
2009	Odisha	Non-SIA State	1 to 6
2009	Chhattisgarh	SIA State	7 to 14
2009	Madhya Pradesh	SIA State	60+
2009	Gujarat	SIA State	15 to 60
2009	Daman & Diu	Non-SIA State	1 to 6
2009	Dadra & Nagar Haveli	Non-SIA State	1 to 6
2009	Maharashtra	Non-SIA State	7 to 14
2009	Andhra Pradesh	Non-SIA State	1 to 6
2009	Karnataka	Non-SIA State	1 to 6
2009	Goa	Non-SIA State	No Deaths
2009	Lakshadweep	Non-SIA State	No Deaths
2009	Kerala	Non-SIA State	No Deaths
2009	Tamil Nadu	Non-SIA State	1 to 6
2009	Puducherry	Non-SIA State	No Deaths
2009	Andaman & Nicobar Islands	Non-SIA State	No Deaths
2010	Jammu & Kashmir	Non-SIA State	1 to 6
2010	Himachal Pradesh	Non-SIA State	1 to 6
2010	Punjab	Non-SIA State	1 to 6
2010	Chandigarh	Non-SIA State	No Deaths
2010	Uttarakhand	Non-SIA State	1 to 6
2010	Haryana	SIA State	1 to 6
2010	Delhi	Non-SIA State	1 to 6
2010	Rajasthan	SIA State	7 to 14
2010	Uttar Pradesh	SIA State	7 to 14
2010	Bihar	SIA State	7 to 14
2010	Sikkim	Non-SIA State	No Deaths
2010	Arunachal Pradesh	SIA State	No Deaths
2010	Nagaland	SIA State	No Deaths
2010	Manipur	SIA State	No Deaths
2010	Mizoram	Non-SIA State	1 to 6
2010	Tripura	SIA State	1 to 6
2010	Meghalaya	SIA State	1 to 6
2010	Assam	SIA State	1 to 6
2010	West Bengal	Non-SIA State	1 to 6
2010	Jharkhand	SIA State	No Deaths
2010	Odisha	Non-SIA State	1 to 6
2010	Chhattisgarh	SIA State	1 to 6
2010	Madhya Pradesh	SIA State	7 to 14
2010	Gujarat	SIA State	7 to 14
2010	Daman & Diu	Non-SIA State	No Deaths
2010	Dadra & Nagar Haveli	Non-SIA State	No Deaths
2010	Maharashtra	Non-SIA State	1 to 6
2010	Andhra Pradesh	Non-SIA State	1 to 6
2010	Karnataka	Non-SIA State	1 to 6
2010	Goa	Non-SIA State	No Deaths
2010	Lakshadweep	Non-SIA State	No Deaths
2010	Kerala	Non-SIA State	No Deaths
2010	Tamil Nadu	Non-SIA State	1 to 6
2010	Puducherry	Non-SIA State	No Deaths
2010	Andaman & Nicobar Islands	Non-SIA State	No Deaths
2011	Jammu & Kashmir	Non-SIA State	1 to 6
2011	Himachal Pradesh	Non-SIA State	No Deaths
2011	Punjab	Non-SIA State	1 to 6
2011	Chandigarh	Non-SIA State	1 to 6
2011	Uttarakhand	Non-SIA State	1 to 6
2011	Haryana	SIA State	1 to 6
2011	Delhi	Non-SIA State	1 to 6
2011	Rajasthan	SIA State	7 to 14
2011	Uttar Pradesh	SIA State	7 to 14
2011	Bihar	SIA State	1 to 6
2011	Sikkim	Non-SIA State	No Deaths
2011	Arunachal Pradesh	SIA State	1 to 6
2011	Nagaland	SIA State	No Deaths
2011	Manipur	SIA State	No Deaths
2011	Mizoram	Non-SIA State	No Deaths
2011	Tripura	SIA State	1 to 6
2011	Meghalaya	SIA State	No Deaths
2011	Assam	SIA State	1 to 6
2011	West Bengal	Non-SIA State	7 to 14
2011	Jharkhand	SIA State	No Deaths
2011	Odisha	Non-SIA State	1 to 6
2011	Chhattisgarh	SIA State	No Deaths
2011	Madhya Pradesh	SIA State	1 to 6
2011	Gujarat	SIA State	1 to 6
2011	Daman & Diu	Non-SIA State	No Deaths
2011	Dadra & Nagar Haveli	Non-SIA State	No Deaths
2011	Maharashtra	Non-SIA State	1 to 6
2011	Andhra Pradesh	Non-SIA State	1 to 6
2011	Karnataka	Non-SIA State	1 to 6
2011	Goa	Non-SIA State	No Deaths
2011	Lakshadweep	Non-SIA State	No Deaths
2011	Kerala	Non-SIA State	No Deaths
2011	Tamil Nadu	Non-SIA State	1 to 6
2011	Puducherry	Non-SIA State	1 to 6
2011	Andaman & Nicobar Islands	Non-SIA State	No Deaths
2012	Jammu & Kashmir	Non-SIA State	1 to 6
2012	Himachal Pradesh	Non-SIA State	No Deaths
2012	Punjab	Non-SIA State	1 to 6
2012	Chandigarh	Non-SIA State	No Deaths
2012	Uttarakhand	Non-SIA State	No Deaths
2012	Haryana	SIA State	1 to 6
2012	Delhi	Non-SIA State	1 to 6
2012	Rajasthan	SIA State	1 to 6
2012	Uttar Pradesh	SIA State	1 to 6
2012	Bihar	SIA State	1 to 6
2012	Sikkim	Non-SIA State	No Deaths
2012	Arunachal Pradesh	SIA State	1 to 6
2012	Nagaland	SIA State	No Deaths
2012	Manipur	SIA State	No Deaths
2012	Mizoram	Non-SIA State	No Deaths
2012	Tripura	SIA State	1 to 6
2012	Meghalaya	SIA State	No Deaths
2012	Assam	SIA State	1 to 6
2012	West Bengal	Non-SIA State	1 to 6
2012	Jharkhand	SIA State	1 to 6
2012	Odisha	Non-SIA State	1 to 6
2012	Chhattisgarh	SIA State	1 to 6
2012	Madhya Pradesh	SIA State	1 to 6
2012	Gujarat	SIA State	1 to 6
2012	Daman & Diu	Non-SIA State	No Deaths
2012	Dadra & Nagar Haveli	Non-SIA State	No Deaths
2012	Maharashtra	Non-SIA State	1 to 6
2012	Andhra Pradesh	Non-SIA State	1 to 6
2012	Karnataka	Non-SIA State	1 to 6
2012	Goa	Non-SIA State	No Deaths
2012	Lakshadweep	Non-SIA State	No Deaths
2012	Kerala	Non-SIA State	No Deaths
2012	Tamil Nadu	Non-SIA State	1 to 6
2012	Puducherry	Non-SIA State	No Deaths
2012	Andaman & Nicobar Islands	Non-SIA State	No Deaths
2013	Jammu & Kashmir	Non-SIA State	No Deaths
2013	Himachal Pradesh	Non-SIA State	No Deaths
2013	Punjab	Non-SIA State	1 to 6
2013	Chandigarh	Non-SIA State	1 to 6
2013	Uttarakhand	Non-SIA State	1 to 6
2013	Haryana	SIA State	1 to 6
2013	Delhi	Non-SIA State	No Deaths
2013	Rajasthan	SIA State	7 to 14
2013	Uttar Pradesh	SIA State	7 to 14
2013	Bihar	SIA State	7 to 14
2013	Sikkim	Non-SIA State	No Deaths
2013	Arunachal Pradesh	SIA State	1 to 6
2013	Nagaland	SIA State	No Deaths
2013	Manipur	SIA State	No Deaths
2013	Mizoram	Non-SIA State	No Deaths
2013	Tripura	SIA State	No Deaths
2013	Meghalaya	SIA State	No Deaths
2013	Assam	SIA State	1 to 6
2013	West Bengal	Non-SIA State	1 to 6
2013	Jharkhand	SIA State	1 to 6
2013	Odisha	Non-SIA State	1 to 6
2013	Chhattisgarh	SIA State	1 to 6
2013	Madhya Pradesh	SIA State	1 to 6
2013	Gujarat	SIA State	7 to 14
2013	Daman & Diu	Non-SIA State	No Deaths
2013	Dadra & Nagar Haveli	Non-SIA State	1 to 6
2013	Maharashtra	Non-SIA State	7 to 14
2013	Andhra Pradesh	Non-SIA State	No Deaths
2013	Karnataka	Non-SIA State	No Deaths
2013	Goa	Non-SIA State	No Deaths
2013	Lakshadweep	Non-SIA State	No Deaths
2013	Kerala	Non-SIA State	No Deaths
2013	Tamil Nadu	Non-SIA State	No Deaths
2013	Puducherry	Non-SIA State	No Deaths
2013	Andaman & Nicobar Islands	Non-SIA State	1 to 6
