# Supplementary material for: The impact of measles immunization campaigns in India using a nationally representative sample of 27,000 child deaths
Source: eLife journal article supplement (doi:10.7554/elife.43290), 2019-03-04
Supplement: supp [file elife-43290-supp-v1.zip › elife_poa_e43290_Figure_1_figure_supplement_2.pdf]

**Figure 1 – figure supplement 2**

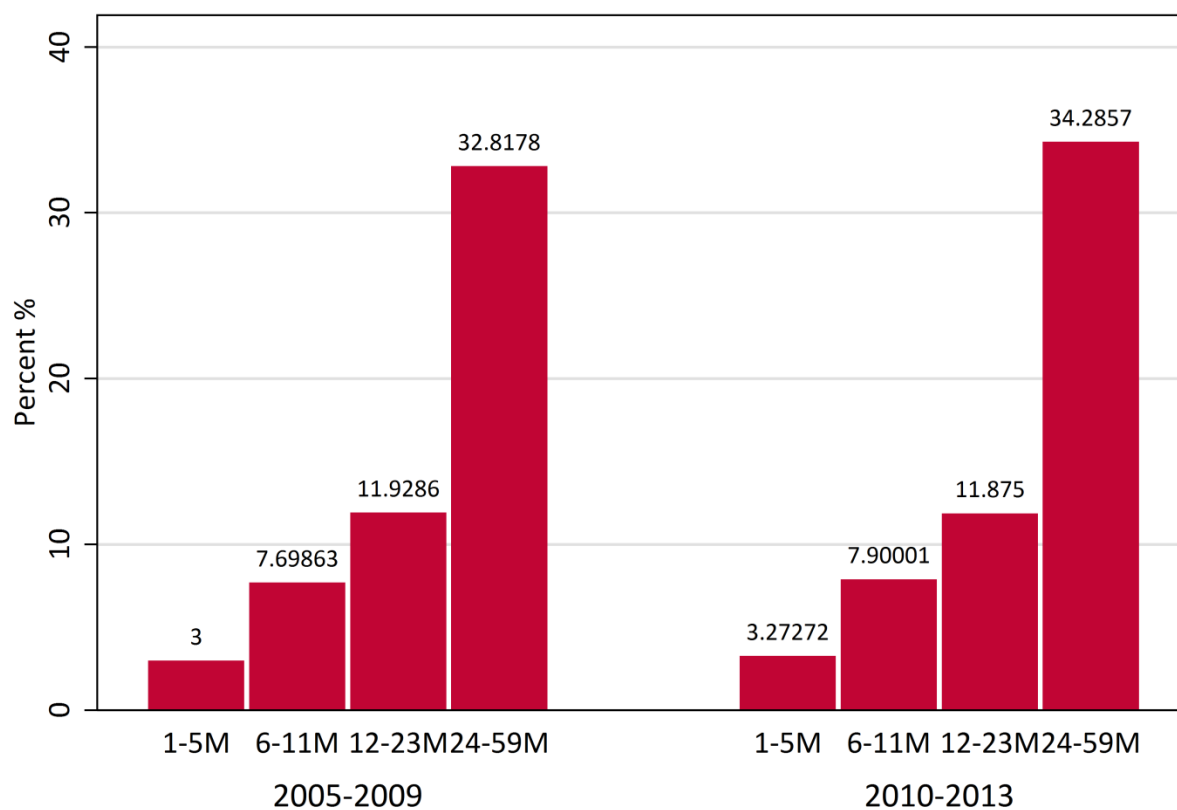

**Proportion of measles deaths by age at death (months) among children aged 1-59 months, 2005–2009 versus 2010–2013, India.**
