# Supplementary material for: The impact of measles immunization campaigns in India using a nationally representative sample of 27,000 child deaths
Source: eLife journal article supplement (doi:10.7554/elife.43290), 2019-03-04
Supplement: supp [file elife-43290-supp-v1.zip › elife_poa_e43290_Figure_1_source_data_1.csv]

treatid	survey_year	time	groupname	mvrate
Measles	2005	2005h1	Female (1-59 Mths.)	2.58502
Measles	2005	2005h2	Female (1-59 Mths.)	3.033931
Measles	2006	2006h1	Female (1-59 Mths.)	2.894921
Measles	2006	2006h2	Female (1-59 Mths.)	2.929801
Measles	2007	2007h1	Female (1-59 Mths.)	2.456253
Measles	2007	2007h2	Female (1-59 Mths.)	2.572925
Measles	2008	2008h1	Female (1-59 Mths.)	2.165047
Measles	2008	2008h2	Female (1-59 Mths.)	3.332856
Measles	2009	2009h1	Female (1-59 Mths.)	3.912817
Measles	2009	2009h2	Female (1-59 Mths.)	4.031994
Measles	2010	2010h1	Female (1-59 Mths.)	2.567442
Measles	2010	2010h2	Female (1-59 Mths.)	1.54615
Measles	2011	2011h1	Female (1-59 Mths.)	1.348263
Measles	2011	2011h2	Female (1-59 Mths.)	1.321464
Measles	2012	2012h1	Female (1-59 Mths.)	1.076944
Measles	2012	2012h2	Female (1-59 Mths.)	1.082945
Measles	2013	2013h1	Female (1-59 Mths.)	1.206636
Measles	2013	2013h2	Female (1-59 Mths.)	1.384341
Measles	2005	2005h1	Male (1-59 Mths.)	1.766333
Measles	2005	2005h2	Male (1-59 Mths.)	1.737962
Measles	2006	2006h1	Male (1-59 Mths.)	1.517643
Measles	2006	2006h2	Male (1-59 Mths.)	1.438582
Measles	2007	2007h1	Male (1-59 Mths.)	1.301666
Measles	2007	2007h2	Male (1-59 Mths.)	1.421065
Measles	2008	2008h1	Male (1-59 Mths.)	1.296411
Measles	2008	2008h2	Male (1-59 Mths.)	1.930932
Measles	2009	2009h1	Male (1-59 Mths.)	2.311064
Measles	2009	2009h2	Male (1-59 Mths.)	2.274814
Measles	2010	2010h1	Male (1-59 Mths.)	1.443843
Measles	2010	2010h2	Male (1-59 Mths.)	0.6821872
Measles	2011	2011h1	Male (1-59 Mths.)	0.5032454
Measles	2011	2011h2	Male (1-59 Mths.)	0.4878488
Measles	2012	2012h1	Male (1-59 Mths.)	0.5064714
Measles	2012	2012h2	Male (1-59 Mths.)	0.6520436
Measles	2013	2013h1	Male (1-59 Mths.)	0.8038636
Measles	2013	2013h2	Male (1-59 Mths.)	0.8986145
Measles	2005	2005h1	Other States (1-59 Mths.)	1.065362
Measles	2005	2005h2	Other States (1-59 Mths.)	1.026924
Measles	2006	2006h1	Other States (1-59 Mths.)	0.9218188
Measles	2006	2006h2	Other States (1-59 Mths.)	0.9889114
Measles	2007	2007h1	Other States (1-59 Mths.)	0.9034496
Measles	2007	2007h2	Other States (1-59 Mths.)	1.020643
Measles	2008	2008h1	Other States (1-59 Mths.)	0.7902406
Measles	2008	2008h2	Other States (1-59 Mths.)	0.8997096
Measles	2009	2009h1	Other States (1-59 Mths.)	1.023096
Measles	2009	2009h2	Other States (1-59 Mths.)	1.167149
Measles	2010	2010h1	Other States (1-59 Mths.)	0.9154835
Measles	2010	2010h2	Other States (1-59 Mths.)	0.6343212
Measles	2011	2011h1	Other States (1-59 Mths.)	0.592015
Measles	2011	2011h2	Other States (1-59 Mths.)	0.6598285
Measles	2012	2012h1	Other States (1-59 Mths.)	0.6220961
Measles	2012	2012h2	Other States (1-59 Mths.)	0.5472013
Measles	2013	2013h1	Other States (1-59 Mths.)	0.6063137
Measles	2013	2013h2	Other States (1-59 Mths.)	0.6607011
Measles	2005	2005h1	Rural (1-59 Mths.)	2.491014
Measles	2005	2005h2	Rural (1-59 Mths.)	2.680477
Measles	2006	2006h1	Rural (1-59 Mths.)	2.442997
Measles	2006	2006h2	Rural (1-59 Mths.)	2.42208
Measles	2007	2007h1	Rural (1-59 Mths.)	2.080485
Measles	2007	2007h2	Rural (1-59 Mths.)	2.186266
Measles	2008	2008h1	Rural (1-59 Mths.)	1.871984
Measles	2008	2008h2	Rural (1-59 Mths.)	2.893471
Measles	2009	2009h1	Rural (1-59 Mths.)	3.513378
Measles	2009	2009h2	Rural (1-59 Mths.)	3.517493
Measles	2010	2010h1	Rural (1-59 Mths.)	2.182761
Measles	2010	2010h2	Rural (1-59 Mths.)	1.129797
Measles	2011	2011h1	Rural (1-59 Mths.)	0.941235
Measles	2011	2011h2	Rural (1-59 Mths.)	0.948339
Measles	2012	2012h1	Rural (1-59 Mths.)	0.805879
Measles	2012	2012h2	Rural (1-59 Mths.)	0.8963958
Measles	2013	2013h1	Rural (1-59 Mths.)	1.10032
Measles	2013	2013h2	Rural (1-59 Mths.)	1.286044
Measles	2005	2005h1	Campaign States (1-59 Mths.)	2.939351
Measles	2005	2005h2	Campaign States (1-59 Mths.)	3.32665
Measles	2006	2006h1	Campaign States (1-59 Mths.)	3.080237
Measles	2006	2006h2	Campaign States (1-59 Mths.)	2.951221
Measles	2007	2007h1	Campaign States (1-59 Mths.)	2.503254
Measles	2007	2007h2	Campaign States (1-59 Mths.)	2.602314
Measles	2008	2008h1	Campaign States (1-59 Mths.)	2.375757
Measles	2008	2008h2	Campaign States (1-59 Mths.)	3.912593
Measles	2009	2009h1	Campaign States (1-59 Mths.)	4.665548
Measles	2009	2009h2	Campaign States (1-59 Mths.)	4.56384
Measles	2010	2010h1	Campaign States (1-59 Mths.)	2.712116
Measles	2010	2010h2	Campaign States (1-59 Mths.)	1.338538
Measles	2011	2011h1	Campaign States (1-59 Mths.)	0.9992812
Measles	2011	2011h2	Campaign States (1-59 Mths.)	0.8726218
Measles	2012	2012h1	Campaign States (1-59 Mths.)	0.7475433
Measles	2012	2012h2	Campaign States (1-59 Mths.)	1.022032
Measles	2013	2013h1	Campaign States (1-59 Mths.)	1.237576
Measles	2013	2013h2	Campaign States (1-59 Mths.)	1.429341
Measles	2005	2005h1	India (1-59 Mths.)	2.15055
Measles	2005	2005h2	India (1-59 Mths.)	2.332622
Measles	2006	2006h1	India (1-59 Mths.)	2.143518
Measles	2006	2006h2	India (1-59 Mths.)	2.113955
Measles	2007	2007h1	India (1-59 Mths.)	1.830785
Measles	2007	2007h2	India (1-59 Mths.)	1.948143
Measles	2008	2008h1	India (1-59 Mths.)	1.69626
Measles	2008	2008h2	India (1-59 Mths.)	2.570649
Measles	2009	2009h1	India (1-59 Mths.)	3.047544
Measles	2009	2009h2	India (1-59 Mths.)	3.078846
Measles	2010	2010h1	India (1-59 Mths.)	1.956095
Measles	2010	2010h2	India (1-59 Mths.)	1.062704
Measles	2011	2011h1	India (1-59 Mths.)	0.8683403
Measles	2011	2011h2	India (1-59 Mths.)	0.8472521
Measles	2012	2012h1	India (1-59 Mths.)	0.757349
Measles	2012	2012h2	India (1-59 Mths.)	0.8486556
Measles	2013	2013h1	India (1-59 Mths.)	0.9910352
Measles	2013	2013h2	India (1-59 Mths.)	1.121379
Measles	2005	2005h1	Urban (1-59 Mths.)	1.06327
Measles	2005	2005h2	Urban (1-59 Mths.)	1.218894
Measles	2006	2006h1	Urban (1-59 Mths.)	1.188977
Measles	2006	2006h2	Urban (1-59 Mths.)	1.131788
Measles	2007	2007h1	Urban (1-59 Mths.)	1.041874
Measles	2007	2007h2	Urban (1-59 Mths.)	1.178239
Measles	2008	2008h1	Urban (1-59 Mths.)	1.141572
Measles	2008	2008h2	Urban (1-59 Mths.)	1.562403
Measles	2009	2009h1	Urban (1-59 Mths.)	1.618555
Measles	2009	2009h2	Urban (1-59 Mths.)	1.721627
Measles	2010	2010h1	Urban (1-59 Mths.)	1.265919
Measles	2010	2010h2	Urban (1-59 Mths.)	0.867829
Measles	2011	2011h1	Urban (1-59 Mths.)	0.6641594
Measles	2011	2011h2	Urban (1-59 Mths.)	0.5419035
Measles	2012	2012h1	Urban (1-59 Mths.)	0.626561
Measles	2012	2012h2	Urban (1-59 Mths.)	0.7256679
Measles	2013	2013h1	Urban (1-59 Mths.)	0.6733071
Measles	2013	2013h2	Urban (1-59 Mths.)	0.6181774
