# Supplementary material for: The impact of measles immunization campaigns in India using a nationally representative sample of 27,000 child deaths
Source: eLife journal article supplement (doi:10.7554/elife.43290), 2019-03-04
Supplement: supp [file elife-43290-supp-v1.zip › elife_poa_e43290_Figure_2_source_data_1.csv]

treatid	survey_year	time	groupname	mvrate
Control	2005	2005h1	Campaign States (1-59 Mths.)	6.738339
Control	2005	2005h2	Campaign States (1-59 Mths.)	6.899327
Control	2006	2006h1	Campaign States (1-59 Mths.)	6.626708
Control	2006	2006h2	Campaign States (1-59 Mths.)	6.834735
Control	2007	2007h1	Campaign States (1-59 Mths.)	6.40776
Control	2007	2007h2	Campaign States (1-59 Mths.)	6.66361
Control	2008	2008h1	Campaign States (1-59 Mths.)	6.309855
Control	2008	2008h2	Campaign States (1-59 Mths.)	6.556816
Control	2009	2009h1	Campaign States (1-59 Mths.)	6.362407
Control	2009	2009h2	Campaign States (1-59 Mths.)	6.6182
Control	2010	2010h1	Campaign States (1-59 Mths.)	6.261476
Control	2010	2010h2	Campaign States (1-59 Mths.)	6.515985
Control	2011	2011h1	Campaign States (1-59 Mths.)	5.939569
Control	2011	2011h2	Campaign States (1-59 Mths.)	6.481216
Control	2012	2012h1	Campaign States (1-59 Mths.)	6.035288
Control	2012	2012h2	Campaign States (1-59 Mths.)	6.739318
Control	2013	2013h1	Campaign States (1-59 Mths.)	6.226863
Control	2013	2013h2	Campaign States (1-59 Mths.)	6.398578
Control	2005	2005h1	Other States (1-59 Mths.)	3.221956
Control	2005	2005h2	Other States (1-59 Mths.)	3.341944
Control	2006	2006h1	Other States (1-59 Mths.)	3.290553
Control	2006	2006h2	Other States (1-59 Mths.)	3.066581
Control	2007	2007h1	Other States (1-59 Mths.)	2.799518
Control	2007	2007h2	Other States (1-59 Mths.)	2.926512
Control	2008	2008h1	Other States (1-59 Mths.)	2.923303
Control	2008	2008h2	Other States (1-59 Mths.)	3.065674
Control	2009	2009h1	Other States (1-59 Mths.)	2.977204
Control	2009	2009h2	Other States (1-59 Mths.)	2.7924
Control	2010	2010h1	Other States (1-59 Mths.)	2.534451
Control	2010	2010h2	Other States (1-59 Mths.)	2.455102
Control	2011	2011h1	Other States (1-59 Mths.)	2.392613
Control	2011	2011h2	Other States (1-59 Mths.)	2.47189
Control	2012	2012h1	Other States (1-59 Mths.)	2.215749
Control	2012	2012h2	Other States (1-59 Mths.)	2.273598
Control	2013	2013h1	Other States (1-59 Mths.)	2.164529
Control	2013	2013h2	Other States (1-59 Mths.)	2.250405
Measles	2005	2005h1	Other States (1-59 Mths.)	1.065362
Measles	2005	2005h2	Other States (1-59 Mths.)	1.026924
Measles	2006	2006h1	Other States (1-59 Mths.)	0.9218188
Measles	2006	2006h2	Other States (1-59 Mths.)	0.9889114
Measles	2007	2007h1	Other States (1-59 Mths.)	0.9034496
Measles	2007	2007h2	Other States (1-59 Mths.)	1.020643
Measles	2008	2008h1	Other States (1-59 Mths.)	0.7902406
Measles	2008	2008h2	Other States (1-59 Mths.)	0.8997096
Measles	2009	2009h1	Other States (1-59 Mths.)	1.023096
Measles	2009	2009h2	Other States (1-59 Mths.)	1.167149
Measles	2010	2010h1	Other States (1-59 Mths.)	0.9154835
Measles	2010	2010h2	Other States (1-59 Mths.)	0.6343212
Measles	2011	2011h1	Other States (1-59 Mths.)	0.592015
Measles	2011	2011h2	Other States (1-59 Mths.)	0.6598285
Measles	2012	2012h1	Other States (1-59 Mths.)	0.6220961
Measles	2012	2012h2	Other States (1-59 Mths.)	0.5472013
Measles	2013	2013h1	Other States (1-59 Mths.)	0.6063137
Measles	2013	2013h2	Other States (1-59 Mths.)	0.6607011
Measles	2005	2005h1	Campaign States (1-59 Mths.)	2.939351
Measles	2005	2005h2	Campaign States (1-59 Mths.)	3.32665
Measles	2006	2006h1	Campaign States (1-59 Mths.)	3.080237
Measles	2006	2006h2	Campaign States (1-59 Mths.)	2.951221
Measles	2007	2007h1	Campaign States (1-59 Mths.)	2.503254
Measles	2007	2007h2	Campaign States (1-59 Mths.)	2.602314
Measles	2008	2008h1	Campaign States (1-59 Mths.)	2.375757
Measles	2008	2008h2	Campaign States (1-59 Mths.)	3.912593
Measles	2009	2009h1	Campaign States (1-59 Mths.)	4.665548
Measles	2009	2009h2	Campaign States (1-59 Mths.)	4.56384
Measles	2010	2010h1	Campaign States (1-59 Mths.)	2.712116
Measles	2010	2010h2	Campaign States (1-59 Mths.)	1.338538
Measles	2011	2011h1	Campaign States (1-59 Mths.)	0.9992812
Measles	2011	2011h2	Campaign States (1-59 Mths.)	0.8726218
Measles	2012	2012h1	Campaign States (1-59 Mths.)	0.7475433
Measles	2012	2012h2	Campaign States (1-59 Mths.)	1.022032
Measles	2013	2013h1	Campaign States (1-59 Mths.)	1.237576
Measles	2013	2013h2	Campaign States (1-59 Mths.)	1.429341
Pneumonia	2005	2005h1	Campaign States (1-59 Mths.)	13.79247
Pneumonia	2005	2005h2	Campaign States (1-59 Mths.)	14.03206
Pneumonia	2006	2006h1	Campaign States (1-59 Mths.)	12.99453
Pneumonia	2006	2006h2	Campaign States (1-59 Mths.)	13.38229
Pneumonia	2007	2007h1	Campaign States (1-59 Mths.)	12.52945
Pneumonia	2007	2007h2	Campaign States (1-59 Mths.)	12.91761
Pneumonia	2008	2008h1	Campaign States (1-59 Mths.)	11.48916
Pneumonia	2008	2008h2	Campaign States (1-59 Mths.)	11.37472
Pneumonia	2009	2009h1	Campaign States (1-59 Mths.)	10.26285
Pneumonia	2009	2009h2	Campaign States (1-59 Mths.)	10.09966
Pneumonia	2010	2010h1	Campaign States (1-59 Mths.)	9.322775
Pneumonia	2010	2010h2	Campaign States (1-59 Mths.)	9.705333
Pneumonia	2011	2011h1	Campaign States (1-59 Mths.)	9.234212
Pneumonia	2011	2011h2	Campaign States (1-59 Mths.)	9.643519
Pneumonia	2012	2012h1	Campaign States (1-59 Mths.)	8.148681
Pneumonia	2012	2012h2	Campaign States (1-59 Mths.)	8.102276
Pneumonia	2013	2013h1	Campaign States (1-59 Mths.)	7.162946
Pneumonia	2013	2013h2	Campaign States (1-59 Mths.)	7.518021
Diarrhoea	2005	2005h1	Campaign States (1-59 Mths.)	14.93458
Diarrhoea	2005	2005h2	Campaign States (1-59 Mths.)	14.72705
Diarrhoea	2006	2006h1	Campaign States (1-59 Mths.)	14.12545
Diarrhoea	2006	2006h2	Campaign States (1-59 Mths.)	14.40042
Diarrhoea	2007	2007h1	Campaign States (1-59 Mths.)	13.23718
Diarrhoea	2007	2007h2	Campaign States (1-59 Mths.)	13.14389
Diarrhoea	2008	2008h1	Campaign States (1-59 Mths.)	12.58838
Diarrhoea	2008	2008h2	Campaign States (1-59 Mths.)	13.00178
Diarrhoea	2009	2009h1	Campaign States (1-59 Mths.)	11.81456
Diarrhoea	2009	2009h2	Campaign States (1-59 Mths.)	11.8727
Diarrhoea	2010	2010h1	Campaign States (1-59 Mths.)	10.41477
Diarrhoea	2010	2010h2	Campaign States (1-59 Mths.)	10.19193
Diarrhoea	2011	2011h1	Campaign States (1-59 Mths.)	8.832767
Diarrhoea	2011	2011h2	Campaign States (1-59 Mths.)	8.954645
Diarrhoea	2012	2012h1	Campaign States (1-59 Mths.)	8.219751
Diarrhoea	2012	2012h2	Campaign States (1-59 Mths.)	8.462141
Diarrhoea	2013	2013h1	Campaign States (1-59 Mths.)	8.111384
Diarrhoea	2013	2013h2	Campaign States (1-59 Mths.)	8.34759
