# Supplementary material for: The impact of measles immunization campaigns in India using a nationally representative sample of 27,000 child deaths
Source: eLife journal article supplement (doi:10.7554/elife.43290), 2019-03-04
Supplement: supp [file elife-43290-supp-v1.zip › elife_poa_e43290_Figure_3_source_data_1.csv]

treatid	survey_year	time	groupname	mvrate
Control Group	2005	2005h1	Campaign States (12-59 Mths.)	4.033487
Control Group	2005	2005h2	Campaign States (12-59 Mths.)	4.234277
Control Group	2006	2006h1	Campaign States (12-59 Mths.)	3.926829
Control Group	2006	2006h2	Campaign States (12-59 Mths.)	4.076763
Control Group	2007	2007h1	Campaign States (12-59 Mths.)	3.774202
Control Group	2007	2007h2	Campaign States (12-59 Mths.)	3.936681
Control Group	2008	2008h1	Campaign States (12-59 Mths.)	3.740945
Control Group	2008	2008h2	Campaign States (12-59 Mths.)	4.09976
Control Group	2009	2009h1	Campaign States (12-59 Mths.)	3.976692
Control Group	2009	2009h2	Campaign States (12-59 Mths.)	4.234185
Control Group	2010	2010h1	Campaign States (12-59 Mths.)	3.782966
Control Group	2010	2010h2	Campaign States (12-59 Mths.)	4.02177
Control Group	2011	2011h1	Campaign States (12-59 Mths.)	3.776725
Control Group	2011	2011h2	Campaign States (12-59 Mths.)	4.193089
Control Group	2012	2012h1	Campaign States (12-59 Mths.)	3.910203
Control Group	2012	2012h2	Campaign States (12-59 Mths.)	4.442332
Control Group	2013	2013h1	Campaign States (12-59 Mths.)	4.095568
Control Group	2013	2013h2	Campaign States (12-59 Mths.)	4.242862
Control Group	2005	2005h1	Campaign States (1-11 Mths.)	2.718518
Control Group	2005	2005h2	Campaign States (1-11 Mths.)	2.692277
Control Group	2006	2006h1	Campaign States (1-11 Mths.)	2.706583
Control Group	2006	2006h2	Campaign States (1-11 Mths.)	2.778817
Control Group	2007	2007h1	Campaign States (1-11 Mths.)	2.654785
Control Group	2007	2007h2	Campaign States (1-11 Mths.)	2.76287
Control Group	2008	2008h1	Campaign States (1-11 Mths.)	2.59658
Control Group	2008	2008h2	Campaign States (1-11 Mths.)	2.509834
Control Group	2009	2009h1	Campaign States (1-11 Mths.)	2.410671
Control Group	2009	2009h2	Campaign States (1-11 Mths.)	2.438032
Control Group	2010	2010h1	Campaign States (1-11 Mths.)	2.506862
Control Group	2010	2010h2	Campaign States (1-11 Mths.)	2.581993
Control Group	2011	2011h1	Campaign States (1-11 Mths.)	2.244787
Control Group	2011	2011h2	Campaign States (1-11 Mths.)	2.410829
Control Group	2012	2012h1	Campaign States (1-11 Mths.)	2.229868
Control Group	2012	2012h2	Campaign States (1-11 Mths.)	2.497496
Control Group	2013	2013h1	Campaign States (1-11 Mths.)	2.309417
Control Group	2013	2013h2	Campaign States (1-11 Mths.)	2.364078
Control Group	2005	2005h1	Campaign States - Boys (1-59 Mths.)	6.630837
Control Group	2005	2005h2	Campaign States - Boys (1-59 Mths.)	6.698438
Control Group	2006	2006h1	Campaign States - Boys (1-59 Mths.)	6.572405
Control Group	2006	2006h2	Campaign States - Boys (1-59 Mths.)	6.500604
Control Group	2007	2007h1	Campaign States - Boys (1-59 Mths.)	6.284931
Control Group	2007	2007h2	Campaign States - Boys (1-59 Mths.)	5.974403
Control Group	2008	2008h1	Campaign States - Boys (1-59 Mths.)	5.522561
Control Group	2008	2008h2	Campaign States - Boys (1-59 Mths.)	5.769913
Control Group	2009	2009h1	Campaign States - Boys (1-59 Mths.)	5.862672
Control Group	2009	2009h2	Campaign States - Boys (1-59 Mths.)	6.118321
Control Group	2010	2010h1	Campaign States - Boys (1-59 Mths.)	5.657899
Control Group	2010	2010h2	Campaign States - Boys (1-59 Mths.)	5.978966
Control Group	2011	2011h1	Campaign States - Boys (1-59 Mths.)	5.340537
Control Group	2011	2011h2	Campaign States - Boys (1-59 Mths.)	5.602214
Control Group	2012	2012h1	Campaign States - Boys (1-59 Mths.)	4.961435
Control Group	2012	2012h2	Campaign States - Boys (1-59 Mths.)	5.445171
Control Group	2013	2013h1	Campaign States - Boys (1-59 Mths.)	5.273029
Control Group	2013	2013h2	Campaign States - Boys (1-59 Mths.)	5.49051
Control Group	2005	2005h1	Campaign States - Girls (1-59 Mths.)	6.80959
Control Group	2005	2005h2	Campaign States - Girls (1-59 Mths.)	7.0968
Control Group	2006	2006h1	Campaign States - Girls (1-59 Mths.)	6.606812
Control Group	2006	2006h2	Campaign States - Girls (1-59 Mths.)	7.146018
Control Group	2007	2007h1	Campaign States - Girls (1-59 Mths.)	6.476099
Control Group	2007	2007h2	Campaign States - Girls (1-59 Mths.)	7.432959
Control Group	2008	2008h1	Campaign States - Girls (1-59 Mths.)	7.177732
Control Group	2008	2008h2	Campaign States - Girls (1-59 Mths.)	7.384568
Control Group	2009	2009h1	Campaign States - Girls (1-59 Mths.)	6.834193
Control Group	2009	2009h2	Campaign States - Girls (1-59 Mths.)	7.089499
Control Group	2010	2010h1	Campaign States - Girls (1-59 Mths.)	6.885742
Control Group	2010	2010h2	Campaign States - Girls (1-59 Mths.)	7.01212
Control Group	2011	2011h1	Campaign States - Girls (1-59 Mths.)	6.482266
Control Group	2011	2011h2	Campaign States - Girls (1-59 Mths.)	7.384691
Control Group	2012	2012h1	Campaign States - Girls (1-59 Mths.)	7.198967
Control Group	2012	2012h2	Campaign States - Girls (1-59 Mths.)	8.148593
Control Group	2013	2013h1	Campaign States - Girls (1-59 Mths.)	7.155888
Control Group	2013	2013h2	Campaign States - Girls (1-59 Mths.)	7.239165
Measles	2005	2005h1	Campaign States (12-59 Mths.)	1.948436
Measles	2005	2005h2	Campaign States (12-59 Mths.)	2.299026
Measles	2006	2006h1	Campaign States (12-59 Mths.)	2.05756
Measles	2006	2006h2	Campaign States (12-59 Mths.)	1.968248
Measles	2007	2007h1	Campaign States (12-59 Mths.)	1.588241
Measles	2007	2007h2	Campaign States (12-59 Mths.)	1.719994
Measles	2008	2008h1	Campaign States (12-59 Mths.)	1.576408
Measles	2008	2008h2	Campaign States (12-59 Mths.)	2.529983
Measles	2009	2009h1	Campaign States (12-59 Mths.)	2.84367
Measles	2009	2009h2	Campaign States (12-59 Mths.)	2.810013
Measles	2010	2010h1	Campaign States (12-59 Mths.)	1.752055
Measles	2010	2010h2	Campaign States (12-59 Mths.)	1.061224
Measles	2011	2011h1	Campaign States (12-59 Mths.)	.8373789
Measles	2011	2011h2	Campaign States (12-59 Mths.)	.6661126
Measles	2012	2012h1	Campaign States (12-59 Mths.)	.4690404
Measles	2012	2012h2	Campaign States (12-59 Mths.)	.5450838
Measles	2013	2013h1	Campaign States (12-59 Mths.)	.7396016
Measles	2013	2013h2	Campaign States (12-59 Mths.)	.9011294
Measles	2005	2005h1	Campaign States (1-11 Mths.)	.998624
Measles	2005	2005h2	Campaign States (1-11 Mths.)	1.049345
Measles	2006	2006h1	Campaign States (1-11 Mths.)	1.025964
Measles	2006	2006h2	Campaign States (1-11 Mths.)	1.006532
Measles	2007	2007h1	Campaign States (1-11 Mths.)	.9347692
Measles	2007	2007h2	Campaign States (1-11 Mths.)	.9209026
Measles	2008	2008h1	Campaign States (1-11 Mths.)	.826709
Measles	2008	2008h2	Campaign States (1-11 Mths.)	1.422494
Measles	2009	2009h1	Campaign States (1-11 Mths.)	1.83463
Measles	2009	2009h2	Campaign States (1-11 Mths.)	1.783358
Measles	2010	2010h1	Campaign States (1-11 Mths.)	.9824182
Measles	2010	2010h2	Campaign States (1-11 Mths.)	.3278431
Measles	2011	2011h1	Campaign States (1-11 Mths.)	.2008893
Measles	2011	2011h2	Campaign States (1-11 Mths.)	.2394534
Measles	2012	2012h1	Campaign States (1-11 Mths.)	.2837912
Measles	2012	2012h2	Campaign States (1-11 Mths.)	.4783066
Measles	2013	2013h1	Campaign States (1-11 Mths.)	.514199
Measles	2013	2013h2	Campaign States (1-11 Mths.)	.5556028
Measles	2005	2005h1	Campaign States - Boys (1-59 Mths.)	2.436191
Measles	2005	2005h2	Campaign States - Boys (1-59 Mths.)	2.419471
Measles	2006	2006h1	Campaign States - Boys (1-59 Mths.)	2.068315
Measles	2006	2006h2	Campaign States - Boys (1-59 Mths.)	1.863652
Measles	2007	2007h1	Campaign States - Boys (1-59 Mths.)	1.692552
Measles	2007	2007h2	Campaign States - Boys (1-59 Mths.)	1.869458
Measles	2008	2008h1	Campaign States - Boys (1-59 Mths.)	1.840314
Measles	2008	2008h2	Campaign States - Boys (1-59 Mths.)	3.048653
Measles	2009	2009h1	Campaign States - Boys (1-59 Mths.)	3.619958
Measles	2009	2009h2	Campaign States - Boys (1-59 Mths.)	3.413613
Measles	2010	2010h1	Campaign States - Boys (1-59 Mths.)	2.039222
Measles	2010	2010h2	Campaign States - Boys (1-59 Mths.)	.8166842
Measles	2011	2011h1	Campaign States - Boys (1-59 Mths.)	.5969268
Measles	2011	2011h2	Campaign States - Boys (1-59 Mths.)	.5312591
Measles	2012	2012h1	Campaign States - Boys (1-59 Mths.)	.642621
Measles	2012	2012h2	Campaign States - Boys (1-59 Mths.)	.959277
Measles	2013	2013h1	Campaign States - Boys (1-59 Mths.)	1.061582
Measles	2013	2013h2	Campaign States - Boys (1-59 Mths.)	1.159113
Measles	2005	2005h1	Campaign States - Girls (1-59 Mths.)	3.510183
Measles	2005	2005h2	Campaign States - Girls (1-59 Mths.)	4.372383
Measles	2006	2006h1	Campaign States - Girls (1-59 Mths.)	4.267147
Measles	2006	2006h2	Campaign States - Girls (1-59 Mths.)	4.230927
Measles	2007	2007h1	Campaign States - Girls (1-59 Mths.)	3.443351
Measles	2007	2007h2	Campaign States - Girls (1-59 Mths.)	3.449138
Measles	2008	2008h1	Campaign States - Girls (1-59 Mths.)	2.989926
Measles	2008	2008h2	Campaign States - Girls (1-59 Mths.)	4.923558
Measles	2009	2009h1	Campaign States - Girls (1-59 Mths.)	5.883908
Measles	2009	2009h2	Campaign States - Girls (1-59 Mths.)	5.909483
Measles	2010	2010h1	Campaign States - Girls (1-59 Mths.)	3.49206
Measles	2010	2010h2	Campaign States - Girls (1-59 Mths.)	1.994895
Measles	2011	2011h1	Campaign States - Girls (1-59 Mths.)	1.524987
Measles	2011	2011h2	Campaign States - Girls (1-59 Mths.)	1.32028
Measles	2012	2012h1	Campaign States - Girls (1-59 Mths.)	.8311309
Measles	2012	2012h2	Campaign States - Girls (1-59 Mths.)	1.017884
Measles	2013	2013h1	Campaign States - Girls (1-59 Mths.)	1.399237
Measles	2013	2013h2	Campaign States - Girls (1-59 Mths.)	1.730995
