# Supplementary material for: The impact of measles immunization campaigns in India using a nationally representative sample of 27,000 child deaths
Source: eLife journal article supplement (doi:10.7554/elife.43290), 2019-03-04
Supplement: supp [file elife-43290-supp-v1.zip › elife_poa_e43290_Figure_4_source_data_1.csv]

treatid	survey_year	time	groupname	mvrate
Control Group	2005	2005h1	Campaign States (1-59 Mths.)	6.738339
Control Group	2005	2005h2	Campaign States (1-59 Mths.)	6.899327
Control Group	2006	2006h1	Campaign States (1-59 Mths.)	6.626708
Control Group	2006	2006h2	Campaign States (1-59 Mths.)	6.834735
Control Group	2007	2007h1	Campaign States (1-59 Mths.)	6.40776
Control Group	2007	2007h2	Campaign States (1-59 Mths.)	6.66361
Control Group	2008	2008h1	Campaign States (1-59 Mths.)	6.309855
Control Group	2008	2008h2	Campaign States (1-59 Mths.)	6.556816
Control Group	2009	2009h1	Campaign States (1-59 Mths.)	6.362407
Control Group	2009	2009h2	Campaign States (1-59 Mths.)	6.6182
Control Group	2010	2010h1	Campaign States (1-59 Mths.)	6.261476
Control Group	2010	2010h2	Campaign States (1-59 Mths.)	6.515985
Control Group	2011	2011h1	Campaign States (1-59 Mths.)	5.939569
Control Group	2011	2011h2	Campaign States (1-59 Mths.)	6.481216
Control Group	2012	2012h1	Campaign States (1-59 Mths.)	6.035288
Control Group	2012	2012h2	Campaign States (1-59 Mths.)	6.739318
Control Group	2013	2013h1	Campaign States (1-59 Mths.)	6.226863
Control Group	2013	2013h2	Campaign States (1-59 Mths.)	6.398578
Control Group	2005	2005h1	India (1-59 Mths.)	7.011849
Control Group	2005	2005h2	India (1-59 Mths.)	7.113309
Control Group	2006	2006h1	India (1-59 Mths.)	6.773829
Control Group	2006	2006h2	India (1-59 Mths.)	7.053584
Control Group	2007	2007h1	India (1-59 Mths.)	6.761564
Control Group	2007	2007h2	India (1-59 Mths.)	6.882815
Control Group	2008	2008h1	India (1-59 Mths.)	6.601949
Control Group	2008	2008h2	India (1-59 Mths.)	6.712251
Control Group	2009	2009h1	India (1-59 Mths.)	6.476367
Control Group	2009	2009h2	India (1-59 Mths.)	6.631951
Control Group	2010	2010h1	India (1-59 Mths.)	6.292192
Control Group	2010	2010h2	India (1-59 Mths.)	6.536681
Control Group	2011	2011h1	India (1-59 Mths.)	6.30799
Control Group	2011	2011h2	India (1-59 Mths.)	6.628905
Control Group	2012	2012h1	India (1-59 Mths.)	6.271769
Control Group	2012	2012h2	India (1-59 Mths.)	6.51083
Control Group	2013	2013h1	India (1-59 Mths.)	6.31785
Control Group	2013	2013h2	India (1-59 Mths.)	6.486911
Measles	2005	2005h1	Campaign States (1-59 Mths.)	1.514361
Measles	2005	2005h2	Campaign States (1-59 Mths.)	1.754815
Measles	2006	2006h1	Campaign States (1-59 Mths.)	1.56118
Measles	2006	2006h2	Campaign States (1-59 Mths.)	1.58503
Measles	2007	2007h1	Campaign States (1-59 Mths.)	1.22282
Measles	2007	2007h2	Campaign States (1-59 Mths.)	1.376095
Measles	2008	2008h1	Campaign States (1-59 Mths.)	1.270014
Measles	2008	2008h2	Campaign States (1-59 Mths.)	1.415776
Measles	2009	2009h1	Campaign States (1-59 Mths.)	0.9760051
Measles	2009	2009h2	Campaign States (1-59 Mths.)	0.8691413
Measles	2010	2010h1	Campaign States (1-59 Mths.)	0.6032022
Measles	2010	2010h2	Campaign States (1-59 Mths.)	0.6282331
Measles	2011	2011h1	Campaign States (1-59 Mths.)	0.493433
Measles	2011	2011h2	Campaign States (1-59 Mths.)	0.4427605
Measles	2012	2012h1	Campaign States (1-59 Mths.)	0.366782
Measles	2012	2012h2	Campaign States (1-59 Mths.)	0.3553878
Measles	2013	2013h1	Campaign States (1-59 Mths.)	0.2832314
Measles	2013	2013h2	Campaign States (1-59 Mths.)	0.2113355
Measles	2005	2005h1	India (1-59 Mths.)	1.029778
Measles	2005	2005h2	India (1-59 Mths.)	1.178738
Measles	2006	2006h1	India (1-59 Mths.)	1.048618
Measles	2006	2006h2	India (1-59 Mths.)	1.075388
Measles	2007	2007h1	India (1-59 Mths.)	0.8276411
Measles	2007	2007h2	India (1-59 Mths.)	0.934724
Measles	2008	2008h1	India (1-59 Mths.)	0.8280904
Measles	2008	2008h2	India (1-59 Mths.)	0.9602342
Measles	2009	2009h1	India (1-59 Mths.)	0.6701212
Measles	2009	2009h2	India (1-59 Mths.)	0.6284291
Measles	2010	2010h1	India (1-59 Mths.)	0.402727
Measles	2010	2010h2	India (1-59 Mths.)	0.4293008
Measles	2011	2011h1	India (1-59 Mths.)	0.3588255
Measles	2011	2011h2	India (1-59 Mths.)	0.365721
Measles	2012	2012h1	India (1-59 Mths.)	0.3074504
Measles	2012	2012h2	India (1-59 Mths.)	0.2758158
Measles	2013	2013h1	India (1-59 Mths.)	0.2274584
Measles	2013	2013h2	India (1-59 Mths.)	0.1928357
Measles	2005	2005h1	Campaign States (1-59 Mths.)	1.845213
Measles	2005	2005h2	Campaign States (1-59 Mths.)	1.995162
Measles	2006	2006h1	Campaign States (1-59 Mths.)	1.73392
Measles	2006	2006h2	Campaign States (1-59 Mths.)	1.690121
Measles	2007	2007h1	Campaign States (1-59 Mths.)	1.388012
Measles	2007	2007h2	Campaign States (1-59 Mths.)	1.525302
Measles	2008	2008h1	Campaign States (1-59 Mths.)	1.38866
Measles	2008	2008h2	Campaign States (1-59 Mths.)	1.516875
Measles	2009	2009h1	Campaign States (1-59 Mths.)	1.10379
Measles	2009	2009h2	Campaign States (1-59 Mths.)	1.020694
Measles	2010	2010h1	Campaign States (1-59 Mths.)	0.7150893
Measles	2010	2010h2	Campaign States (1-59 Mths.)	0.7129325
Measles	2011	2011h1	Campaign States (1-59 Mths.)	0.578177
Measles	2011	2011h2	Campaign States (1-59 Mths.)	0.5021902
Measles	2012	2012h1	Campaign States (1-59 Mths.)	0.4763103
Measles	2012	2012h2	Campaign States (1-59 Mths.)	0.4402706
Measles	2013	2013h1	Campaign States (1-59 Mths.)	0.3826677
Measles	2013	2013h2	Campaign States (1-59 Mths.)	0.2655959
Measles	2005	2005h1	India (1-59 Mths.)	1.27696
Measles	2005	2005h2	India (1-59 Mths.)	1.411049
Measles	2006	2006h1	India (1-59 Mths.)	1.225589
Measles	2006	2006h2	India (1-59 Mths.)	1.207641
Measles	2007	2007h1	India (1-59 Mths.)	0.9561549
Measles	2007	2007h2	India (1-59 Mths.)	1.042967
Measles	2008	2008h1	India (1-59 Mths.)	0.9136655
Measles	2008	2008h2	India (1-59 Mths.)	1.034214
Measles	2009	2009h1	India (1-59 Mths.)	0.7564571
Measles	2009	2009h2	India (1-59 Mths.)	0.7261245
Measles	2010	2010h1	India (1-59 Mths.)	0.4854172
Measles	2010	2010h2	India (1-59 Mths.)	0.4935804
Measles	2011	2011h1	India (1-59 Mths.)	0.4355881
Measles	2011	2011h2	India (1-59 Mths.)	0.4346642
Measles	2012	2012h1	India (1-59 Mths.)	0.3901471
Measles	2012	2012h2	India (1-59 Mths.)	0.3337597
Measles	2013	2013h1	India (1-59 Mths.)	0.2861958
Measles	2013	2013h2	India (1-59 Mths.)	0.2352949
Measles	2005	2005h1	Campaign States (1-59 Mths.)	2.939351
Measles	2005	2005h2	Campaign States (1-59 Mths.)	3.32665
Measles	2006	2006h1	Campaign States (1-59 Mths.)	3.080237
Measles	2006	2006h2	Campaign States (1-59 Mths.)	2.951221
Measles	2007	2007h1	Campaign States (1-59 Mths.)	2.503254
Measles	2007	2007h2	Campaign States (1-59 Mths.)	2.602314
Measles	2008	2008h1	Campaign States (1-59 Mths.)	2.375757
Measles	2008	2008h2	Campaign States (1-59 Mths.)	3.912593
Measles	2009	2009h1	Campaign States (1-59 Mths.)	4.665548
Measles	2009	2009h2	Campaign States (1-59 Mths.)	4.56384
Measles	2010	2010h1	Campaign States (1-59 Mths.)	2.712116
Measles	2010	2010h2	Campaign States (1-59 Mths.)	1.338538
Measles	2011	2011h1	Campaign States (1-59 Mths.)	0.9992812
Measles	2011	2011h2	Campaign States (1-59 Mths.)	0.8726218
Measles	2012	2012h1	Campaign States (1-59 Mths.)	0.7475433
Measles	2012	2012h2	Campaign States (1-59 Mths.)	1.022032
Measles	2013	2013h1	Campaign States (1-59 Mths.)	1.237576
Measles	2013	2013h2	Campaign States (1-59 Mths.)	1.429341
Measles	2005	2005h1	India (1-59 Mths.)	2.15055
Measles	2005	2005h2	India (1-59 Mths.)	2.332622
Measles	2006	2006h1	India (1-59 Mths.)	2.143518
Measles	2006	2006h2	India (1-59 Mths.)	2.113955
Measles	2007	2007h1	India (1-59 Mths.)	1.830785
Measles	2007	2007h2	India (1-59 Mths.)	1.948143
Measles	2008	2008h1	India (1-59 Mths.)	1.69626
Measles	2008	2008h2	India (1-59 Mths.)	2.570649
Measles	2009	2009h1	India (1-59 Mths.)	3.047544
Measles	2009	2009h2	India (1-59 Mths.)	3.078846
Measles	2010	2010h1	India (1-59 Mths.)	1.956095
Measles	2010	2010h2	India (1-59 Mths.)	1.062704
Measles	2011	2011h1	India (1-59 Mths.)	0.8683403
Measles	2011	2011h2	India (1-59 Mths.)	0.8472521
Measles	2012	2012h1	India (1-59 Mths.)	0.757349
Measles	2012	2012h2	India (1-59 Mths.)	0.8486556
Measles	2013	2013h1	India (1-59 Mths.)	0.9910352
Measles	2013	2013h2	India (1-59 Mths.)	1.121379
