# Supplementary material for: The impact of measles immunization campaigns in India using a nationally representative sample of 27,000 child deaths
Source: eLife journal article supplement (doi:10.7554/elife.43290), 2019-03-04
Supplement: supp [file elife-43290-supp-v1.zip › elife_poa_e43290_Table_1_source_data_1.csv]

�Child Characteristics	Both Physicians			?1 Physician			Measles Case			Controls (n = 5,970)
	Assigned Measles (n = 621)			Assigned Measles (n = 723)			Definition (n = 1,638)
	Count	Proportion (99% CI)		Count	Proportion (99% CI)		Count	Proportion (99% CI)		Count	Proportion (99% CI)
Age Groups
1 to 11 Months	170.0	25.3	(20.7, 30.5)	228.0	29.0	(24.4, 34.0)	664.0	37.9	(34.6, 41.4)	2581.0	42.5	(40.6, 44.4)
12 to 59 Months	451.0	74.7	(69.5, 79.3)	495.0	71.0	(66.0, 75.6)	974.0	62.1	(58.6, 65.4)	3389.0	57.5	(55.6, 59.4)
Sex
Female	362.0	58.3	(52.6, 63.9)	423.0	59.0	(53.7, 64.2)	941.0	58.7	(55.1, 62.1)	2730.0	46.9	(45.0, 48.8)
Male	259.0	41.7	(36.1, 47.4)	300.0	41.0	(35.8, 46.3)	697.0	41.3	(37.9, 44.9)	3240.0	53.1	(51.2, 55.0)
Type of Residence
Urban	93.0	15.5	(11.6, 20.4)	148.0	15.9	(12.2, 20.5)	243.0	15.9	(13.3, 18.8)	1083.0	20.7	(19.1, 22.4)
Rural	528.0	84.5	(79.6, 88.4)	783.0	84.1	(79.5, 87.8)	1395.0	84.1	(81.2, 86.7)	4887.0	79.3	(77.6, 80.9)
National Health Mission (NHM)
Other States	171.0	16.8	(13.6, 20.7)	206.0	17.8	(14.6, 21.4)	493.0	20.5	(18.1, 23.2)	2955.0	39.4	(37.7, 41.2)
NHM States	450.0	83.2	(79.3, 86.4)	517.0	82.2	(78.6, 85.4)	1145.0	79.5	(76.8, 81.9)	3015.0	60.6	(58.8, 62.3)
Campaign States
Non-campaign States	149.0	13.9	(11.0, 17.5)	187.0	15.0	(12.1, 18.4)	443.0	17.1	(14.9, 19.6)	2968.0	37.2	(35.5, 39.0)
Campaign States	472.0	86.1	(82.5, 89.0)	536.0	85.0	(81.6, 87.9)	1195.0	82.9	(80.4, 85.1)	3002.0	62.8	(61.0, 64.5)
EAG Region
Richer States	205.0	18.0	(14.7, 21.9)	253.0	19.2	(15.9, 22.9)	582.0	21.7	(19.3, 24.4)	3347.0	41.0	(39.2, 42.8)
Poorer States	416.0	82.0	(78.1, 85.3)	470.0	80.8	(77.1, 84.1)	1056.0	78.3	(75.6, 80.7)	2623.0	59.0	(57.2, 60.8)
Family Reported Child
Had History of Measles
Yes	301.0	50.1	(44.4, 55.8)	336.0	47.6	(42.2, 52.9)	1251.0	76.1	(72.9, 79.1)	169.0	3.1	(2.5, 3.9)
No	77.0	11.0	(7.9, 15.0)	102.0	12.8	(9.6, 16.8)	102.0	5.8	(4.4, 7.7)	191.0	2.9	(2.4, 3.6)
Missing	243.0	38.9	(33.5, 44.6)	285.0	39.6	(34.5, 45.0)	285.0	18.0	(15.4, 21.0)	5610.0	93.9	(93.0, 94.8)
Child Received At Least
One Dose of Measles Vaccine
Yes	209.0	31.0	(26.1, 36.5)	240.0	30.9	(26.2, 36.0)	647.0	38.0	(34.6, 41.5)	2494.0	39.8	(37.9, 41.7)
No	295.0	50.2	(44.5, 55.9)	354.0	51.2	(45.8, 56.5)	763.0	47.3	(43.7, 50.8)	2650.0	45.7	(43.8, 47.6)
Missing	117.0	18.8	(14.7, 23.7)	129.0	17.9	(14.2, 22.4)	228.0	14.7	(12.4, 17.5)	826.0	14.5	(13.2, 15.9)
History of Rash
Yes	429.0	67.8	(62.2, 72.9)	504.0	67.8	(62.5, 72.6)	1419.0	85.3	(82.6, 87.7)	593.0	9.7	(8.6, 10.8)
No	179.0	30.6	(25.5, 36.1)	202.0	30.1	(25.4, 35.3)	202.0	13.7	(11.4, 16.4)	3414.0	56.0	(54.1, 57.9)
Missing	13.0	1.7	(0.7, 3.7)	17.0	2.1	(1.0, 4.2)	17.0	1.0	(0.5, 1.9)	1963.0	34.3	(32.5, 36.2)
History of Fever
Yes	536.0	88.1	(84.1, 91.2)	615.0	86.6	(82.7, 89.8)	1208.0	74.1	(70.8, 77.1)	1226.0	19.9	(18.4, 21.5)
No	74.0	10.5	(7.6, 14.4)	93.0	11.7	(8.8, 15.5)	367.0	22.3	(19.5, 25.4)	2771.0	45.7	(43.8, 47.6)
Missing	11.0	1.4	(0.6, 3.3)	15.0	1.7	(0.8, 3.6)	63.0	3.6	(2.5, 5.2)	1973.0	34.4	(32.6, 36.3)
