# Supplementary material for: The impact of measles immunization campaigns in India using a nationally representative sample of 27,000 child deaths
Source: eLife journal article supplement (doi:10.7554/elife.43290), 2019-03-04
Supplement: supp [file elife-43290-supp-v1.zip › elife_poa_e43290_Table_2_source_data_1.csv]

treatid	survey_year	time	state_code	mvrate
Case Group (Measles)	2005	2005h1	Jammu & Kashmir	.766215
Case Group (Measles)	2005	2005h2	Jammu & Kashmir	.8333259
Case Group (Measles)	2006	2006h1	Jammu & Kashmir	.8190394
Case Group (Measles)	2006	2006h2	Jammu & Kashmir	1.664231
Case Group (Measles)	2007	2007h1	Jammu & Kashmir	1.666668
Case Group (Measles)	2007	2007h2	Jammu & Kashmir	1.666668
Case Group (Measles)	2008	2008h1	Jammu & Kashmir	.561567
Case Group (Measles)	2008	2008h2	Jammu & Kashmir	.3977766
Case Group (Measles)	2009	2009h1	Jammu & Kashmir	1.308471
Case Group (Measles)	2009	2009h2	Jammu & Kashmir	1.308471
Case Group (Measles)	2010	2010h1	Jammu & Kashmir	1.299533
Case Group (Measles)	2010	2010h2	Jammu & Kashmir	.3544181
Case Group (Measles)	2011	2011h1	Jammu & Kashmir	.7276288
Case Group (Measles)	2011	2011h2	Jammu & Kashmir	.9400252
Case Group (Measles)	2012	2012h1	Jammu & Kashmir	1.556093
Case Group (Measles)	2012	2012h2	Jammu & Kashmir	1.191858
Case Group (Measles)	2013	2013h1	Jammu & Kashmir	.5892987
Case Group (Measles)	2013	2013h2	Jammu & Kashmir	0
Case Group (Measles)	2005	2005h1	Punjab	1.854763
Case Group (Measles)	2005	2005h2	Punjab	.8124543
Case Group (Measles)	2006	2006h1	Punjab	1.090319
Case Group (Measles)	2006	2006h2	Punjab	1.518528
Case Group (Measles)	2007	2007h1	Punjab	1.772463
Case Group (Measles)	2007	2007h2	Punjab	1.880563
Case Group (Measles)	2008	2008h1	Punjab	1.510884
Case Group (Measles)	2008	2008h2	Punjab	2.184349
Case Group (Measles)	2009	2009h1	Punjab	1.94567
Case Group (Measles)	2009	2009h2	Punjab	2.337797
Case Group (Measles)	2010	2010h1	Punjab	1.44134
Case Group (Measles)	2010	2010h2	Punjab	1.447433
Case Group (Measles)	2011	2011h1	Punjab	1.189326
Case Group (Measles)	2011	2011h2	Punjab	1.309883
Case Group (Measles)	2012	2012h1	Punjab	1.11293
Case Group (Measles)	2012	2012h2	Punjab	.8260028
Case Group (Measles)	2013	2013h1	Punjab	.5054156
Case Group (Measles)	2013	2013h2	Punjab	.454874
Case Group (Measles)	2005	2005h1	Haryana	1.127009
Case Group (Measles)	2005	2005h2	Haryana	1.558215
Case Group (Measles)	2006	2006h1	Haryana	1.241149
Case Group (Measles)	2006	2006h2	Haryana	.9434897
Case Group (Measles)	2007	2007h1	Haryana	.6416697
Case Group (Measles)	2007	2007h2	Haryana	.6839303
Case Group (Measles)	2008	2008h1	Haryana	.792873
Case Group (Measles)	2008	2008h2	Haryana	1.047221
Case Group (Measles)	2009	2009h1	Haryana	.7669281
Case Group (Measles)	2009	2009h2	Haryana	1.245785
Case Group (Measles)	2010	2010h1	Haryana	1.214136
Case Group (Measles)	2010	2010h2	Haryana	1.096872
Case Group (Measles)	2011	2011h1	Haryana	.7198065
Case Group (Measles)	2011	2011h2	Haryana	.2125603
Case Group (Measles)	2012	2012h1	Haryana	.5322383
Case Group (Measles)	2012	2012h2	Haryana	.9490277
Case Group (Measles)	2013	2013h1	Haryana	1.34286
Case Group (Measles)	2013	2013h2	Haryana	1.530718
Case Group (Measles)	2005	2005h1	Delhi	1.241323
Case Group (Measles)	2005	2005h2	Delhi	1.604523
Case Group (Measles)	2006	2006h1	Delhi	1.20685
Case Group (Measles)	2006	2006h2	Delhi	1.112112
Case Group (Measles)	2007	2007h1	Delhi	.9236541
Case Group (Measles)	2007	2007h2	Delhi	.6661896
Case Group (Measles)	2008	2008h1	Delhi	1.06193
Case Group (Measles)	2008	2008h2	Delhi	.931578
Case Group (Measles)	2009	2009h1	Delhi	1.752942
Case Group (Measles)	2009	2009h2	Delhi	1.576835
Case Group (Measles)	2010	2010h1	Delhi	1.880013
Case Group (Measles)	2010	2010h2	Delhi	1.121109
Case Group (Measles)	2011	2011h1	Delhi	.8733507
Case Group (Measles)	2011	2011h2	Delhi	.6964459
Case Group (Measles)	2012	2012h1	Delhi	.8311688
Case Group (Measles)	2012	2012h2	Delhi	.576358
Case Group (Measles)	2013	2013h1	Delhi	.1981969
Case Group (Measles)	2013	2013h2	Delhi	0
Case Group (Measles)	2005	2005h1	Rajasthan	3.451216
Case Group (Measles)	2005	2005h2	Rajasthan	3.028602
Case Group (Measles)	2006	2006h1	Rajasthan	2.702247
Case Group (Measles)	2006	2006h2	Rajasthan	2.319789
Case Group (Measles)	2007	2007h1	Rajasthan	1.923766
Case Group (Measles)	2007	2007h2	Rajasthan	2.263811
Case Group (Measles)	2008	2008h1	Rajasthan	2.629659
Case Group (Measles)	2008	2008h2	Rajasthan	5.533276
Case Group (Measles)	2009	2009h1	Rajasthan	5.465392
Case Group (Measles)	2009	2009h2	Rajasthan	4.858867
Case Group (Measles)	2010	2010h1	Rajasthan	1.882069
Case Group (Measles)	2010	2010h2	Rajasthan	1.198256
Case Group (Measles)	2011	2011h1	Rajasthan	.9203216
Case Group (Measles)	2011	2011h2	Rajasthan	1.057849
Case Group (Measles)	2012	2012h1	Rajasthan	.5147645
Case Group (Measles)	2012	2012h2	Rajasthan	.9110131
Case Group (Measles)	2013	2013h1	Rajasthan	.8075379
Case Group (Measles)	2013	2013h2	Rajasthan	1.211307
Case Group (Measles)	2005	2005h1	Uttar Pradesh	3.095597
Case Group (Measles)	2005	2005h2	Uttar Pradesh	3.83951
Case Group (Measles)	2006	2006h1	Uttar Pradesh	3.605883
Case Group (Measles)	2006	2006h2	Uttar Pradesh	3.418001
Case Group (Measles)	2007	2007h1	Uttar Pradesh	2.701679
Case Group (Measles)	2007	2007h2	Uttar Pradesh	2.675199
Case Group (Measles)	2008	2008h1	Uttar Pradesh	2.258302
Case Group (Measles)	2008	2008h2	Uttar Pradesh	2.540361
Case Group (Measles)	2009	2009h1	Uttar Pradesh	2.725432
Case Group (Measles)	2009	2009h2	Uttar Pradesh	2.786007
Case Group (Measles)	2010	2010h1	Uttar Pradesh	1.976599
Case Group (Measles)	2010	2010h2	Uttar Pradesh	1.300547
Case Group (Measles)	2011	2011h1	Uttar Pradesh	1.116564
Case Group (Measles)	2011	2011h2	Uttar Pradesh	.9542877
Case Group (Measles)	2012	2012h1	Uttar Pradesh	.7036411
Case Group (Measles)	2012	2012h2	Uttar Pradesh	.7004176
Case Group (Measles)	2013	2013h1	Uttar Pradesh	.9614645
Case Group (Measles)	2013	2013h2	Uttar Pradesh	1.042536
Case Group (Measles)	2005	2005h1	Bihar	2.563071
Case Group (Measles)	2005	2005h2	Bihar	3.655176
Case Group (Measles)	2006	2006h1	Bihar	3.10098
Case Group (Measles)	2006	2006h2	Bihar	2.836885
Case Group (Measles)	2007	2007h1	Bihar	2.008082
Case Group (Measles)	2007	2007h2	Bihar	1.849742
Case Group (Measles)	2008	2008h1	Bihar	1.338222
Case Group (Measles)	2008	2008h2	Bihar	4.122152
Case Group (Measles)	2009	2009h1	Bihar	6.351895
Case Group (Measles)	2009	2009h2	Bihar	7.166038
Case Group (Measles)	2010	2010h1	Bihar	4.14937
Case Group (Measles)	2010	2010h2	Bihar	1.925655
Case Group (Measles)	2011	2011h1	Bihar	1.242159
Case Group (Measles)	2011	2011h2	Bihar	.9229056
Case Group (Measles)	2012	2012h1	Bihar	.6854447
Case Group (Measles)	2012	2012h2	Bihar	.8723283
Case Group (Measles)	2013	2013h1	Bihar	1.365111
Case Group (Measles)	2013	2013h2	Bihar	1.671469
Case Group (Measles)	2005	2005h1	Assam	1.873203
Case Group (Measles)	2005	2005h2	Assam	1.873203
Case Group (Measles)	2006	2006h1	Assam	2.859698
Case Group (Measles)	2006	2006h2	Assam	2.521123
Case Group (Measles)	2007	2007h1	Assam	3.34551
Case Group (Measles)	2007	2007h2	Assam	2.870057
Case Group (Measles)	2008	2008h1	Assam	3.32431
Case Group (Measles)	2008	2008h2	Assam	3.567394
Case Group (Measles)	2009	2009h1	Assam	2.612027
Case Group (Measles)	2009	2009h2	Assam	2.836
Case Group (Measles)	2010	2010h1	Assam	2.087067
Case Group (Measles)	2010	2010h2	Assam	2.132746
Case Group (Measles)	2011	2011h1	Assam	1.713095
Case Group (Measles)	2011	2011h2	Assam	2.000899
Case Group (Measles)	2012	2012h1	Assam	2.926664
Case Group (Measles)	2012	2012h2	Assam	2.78985
Case Group (Measles)	2013	2013h1	Assam	2.587185
Case Group (Measles)	2013	2013h2	Assam	1.830634
Case Group (Measles)	2005	2005h1	West Bengal	.7690326
Case Group (Measles)	2005	2005h2	West Bengal	.9404869
Case Group (Measles)	2006	2006h1	West Bengal	.6619405
Case Group (Measles)	2006	2006h2	West Bengal	.7206246
Case Group (Measles)	2007	2007h1	West Bengal	.6237743
Case Group (Measles)	2007	2007h2	West Bengal	.7743578
Case Group (Measles)	2008	2008h1	West Bengal	.6594557
Case Group (Measles)	2008	2008h2	West Bengal	.5805359
Case Group (Measles)	2009	2009h1	West Bengal	.6598813
Case Group (Measles)	2009	2009h2	West Bengal	.8345203
Case Group (Measles)	2010	2010h1	West Bengal	.7416627
Case Group (Measles)	2010	2010h2	West Bengal	.5348606
Case Group (Measles)	2011	2011h1	West Bengal	.7489329
Case Group (Measles)	2011	2011h2	West Bengal	.5902038
Case Group (Measles)	2012	2012h1	West Bengal	.5661564
Case Group (Measles)	2012	2012h2	West Bengal	.1528407
Case Group (Measles)	2013	2013h1	West Bengal	.5587912
Case Group (Measles)	2013	2013h2	West Bengal	.6286402
Case Group (Measles)	2005	2005h1	Jharkhand	2.044408
Case Group (Measles)	2005	2005h2	Jharkhand	2.245269
Case Group (Measles)	2006	2006h1	Jharkhand	2.773813
Case Group (Measles)	2006	2006h2	Jharkhand	1.629253
Case Group (Measles)	2007	2007h1	Jharkhand	.6407028
Case Group (Measles)	2007	2007h2	Jharkhand	1.641801
Case Group (Measles)	2008	2008h1	Jharkhand	2.04372
Case Group (Measles)	2008	2008h2	Jharkhand	5.812744
Case Group (Measles)	2009	2009h1	Jharkhand	9.07111
Case Group (Measles)	2009	2009h2	Jharkhand	8.654978
Case Group (Measles)	2010	2010h1	Jharkhand	4.683952
Case Group (Measles)	2010	2010h2	Jharkhand	0
Case Group (Measles)	2011	2011h1	Jharkhand	0
Case Group (Measles)	2011	2011h2	Jharkhand	0
Case Group (Measles)	2012	2012h1	Jharkhand	.3638057
Case Group (Measles)	2012	2012h2	Jharkhand	1.742438
Case Group (Measles)	2013	2013h1	Jharkhand	2.799821
Case Group (Measles)	2013	2013h2	Jharkhand	3.688694
Case Group (Measles)	2005	2005h1	Odisha	1.562643
Case Group (Measles)	2005	2005h2	Odisha	1.644481
Case Group (Measles)	2006	2006h1	Odisha	1.617337
Case Group (Measles)	2006	2006h2	Odisha	1.729285
Case Group (Measles)	2007	2007h1	Odisha	1.538665
Case Group (Measles)	2007	2007h2	Odisha	1.912504
Case Group (Measles)	2008	2008h1	Odisha	1.386871
Case Group (Measles)	2008	2008h2	Odisha	1.001139
Case Group (Measles)	2009	2009h1	Odisha	.4441279
Case Group (Measles)	2009	2009h2	Odisha	.3577317
Case Group (Measles)	2010	2010h1	Odisha	.6126136
Case Group (Measles)	2010	2010h2	Odisha	.9128035
Case Group (Measles)	2011	2011h1	Odisha	1.315767
Case Group (Measles)	2011	2011h2	Odisha	1.106494
Case Group (Measles)	2012	2012h1	Odisha	1.058468
Case Group (Measles)	2012	2012h2	Odisha	.6695818
Case Group (Measles)	2013	2013h1	Odisha	1.295003
Case Group (Measles)	2013	2013h2	Odisha	1.214066
Case Group (Measles)	2005	2005h1	Chhattisgarh	1.826236
Case Group (Measles)	2005	2005h2	Chhattisgarh	2.402406
Case Group (Measles)	2006	2006h1	Chhattisgarh	2.599783
Case Group (Measles)	2006	2006h2	Chhattisgarh	1.634062
Case Group (Measles)	2007	2007h1	Chhattisgarh	.7701218
Case Group (Measles)	2007	2007h2	Chhattisgarh	1.207352
Case Group (Measles)	2008	2008h1	Chhattisgarh	1.127348
Case Group (Measles)	2008	2008h2	Chhattisgarh	2.210332
Case Group (Measles)	2009	2009h1	Chhattisgarh	3.201408
Case Group (Measles)	2009	2009h2	Chhattisgarh	3.437456
Case Group (Measles)	2010	2010h1	Chhattisgarh	2.156881
Case Group (Measles)	2010	2010h2	Chhattisgarh	.2465007
Case Group (Measles)	2011	2011h1	Chhattisgarh	0
Case Group (Measles)	2011	2011h2	Chhattisgarh	.34958
Case Group (Measles)	2012	2012h1	Chhattisgarh	.3308345
Case Group (Measles)	2012	2012h2	Chhattisgarh	.7784341
Case Group (Measles)	2013	2013h1	Chhattisgarh	.4262732
Case Group (Measles)	2013	2013h2	Chhattisgarh	.6394099
Case Group (Measles)	2005	2005h1	Madhya Pradesh	4.466524
Case Group (Measles)	2005	2005h2	Madhya Pradesh	5.014241
Case Group (Measles)	2006	2006h1	Madhya Pradesh	4.363032
Case Group (Measles)	2006	2006h2	Madhya Pradesh	4.55868
Case Group (Measles)	2007	2007h1	Madhya Pradesh	3.783723
Case Group (Measles)	2007	2007h2	Madhya Pradesh	3.730561
Case Group (Measles)	2008	2008h1	Madhya Pradesh	3.438648
Case Group (Measles)	2008	2008h2	Madhya Pradesh	6.416849
Case Group (Measles)	2009	2009h1	Madhya Pradesh	8.264076
Case Group (Measles)	2009	2009h2	Madhya Pradesh	7.363104
Case Group (Measles)	2010	2010h1	Madhya Pradesh	4.529221
Case Group (Measles)	2010	2010h2	Madhya Pradesh	1.700678
Case Group (Measles)	2011	2011h1	Madhya Pradesh	1.447282
Case Group (Measles)	2011	2011h2	Madhya Pradesh	1.037768
Case Group (Measles)	2012	2012h1	Madhya Pradesh	.6989686
Case Group (Measles)	2012	2012h2	Madhya Pradesh	1.013342
Case Group (Measles)	2013	2013h1	Madhya Pradesh	.9519266
Case Group (Measles)	2013	2013h2	Madhya Pradesh	1.251335
Case Group (Measles)	2005	2005h1	Gujarat	2.083623
Case Group (Measles)	2005	2005h2	Gujarat	2.236732
Case Group (Measles)	2006	2006h1	Gujarat	2.270225
Case Group (Measles)	2006	2006h2	Gujarat	3.372831
Case Group (Measles)	2007	2007h1	Gujarat	3.571956
Case Group (Measles)	2007	2007h2	Gujarat	3.826038
Case Group (Measles)	2008	2008h1	Gujarat	3.197906
Case Group (Measles)	2008	2008h2	Gujarat	3.845508
Case Group (Measles)	2009	2009h1	Gujarat	4.848466
Case Group (Measles)	2009	2009h2	Gujarat	4.428167
Case Group (Measles)	2010	2010h1	Gujarat	3.008653
Case Group (Measles)	2010	2010h2	Gujarat	.9377224
Case Group (Measles)	2011	2011h1	Gujarat	.5418308
Case Group (Measles)	2011	2011h2	Gujarat	.4387212
Case Group (Measles)	2012	2012h1	Gujarat	.7078285
Case Group (Measles)	2012	2012h2	Gujarat	1.084535
Case Group (Measles)	2013	2013h1	Gujarat	1.561786
Case Group (Measles)	2013	2013h2	Gujarat	1.752599
Case Group (Measles)	2005	2005h1	Maharashtra	.9363036
Case Group (Measles)	2005	2005h2	Maharashtra	1.042917
Case Group (Measles)	2006	2006h1	Maharashtra	.647669
Case Group (Measles)	2006	2006h2	Maharashtra	.3364222
Case Group (Measles)	2007	2007h1	Maharashtra	.2538387
Case Group (Measles)	2007	2007h2	Maharashtra	.518254
Case Group (Measles)	2008	2008h1	Maharashtra	.4679601
Case Group (Measles)	2008	2008h2	Maharashtra	.6389413
Case Group (Measles)	2009	2009h1	Maharashtra	.8693061
Case Group (Measles)	2009	2009h2	Maharashtra	1.048152
Case Group (Measles)	2010	2010h1	Maharashtra	.7303327
Case Group (Measles)	2010	2010h2	Maharashtra	.1661835
Case Group (Measles)	2011	2011h1	Maharashtra	.1572146
Case Group (Measles)	2011	2011h2	Maharashtra	.5481267
Case Group (Measles)	2012	2012h1	Maharashtra	.6153581
Case Group (Measles)	2012	2012h2	Maharashtra	.9489917
Case Group (Measles)	2013	2013h1	Maharashtra	1.038274
Case Group (Measles)	2013	2013h2	Maharashtra	1.43333
Case Group (Measles)	2005	2005h1	Andhra Pradesh	.7494631
Case Group (Measles)	2005	2005h2	Andhra Pradesh	.703867
Case Group (Measles)	2006	2006h1	Andhra Pradesh	.5519274
Case Group (Measles)	2006	2006h2	Andhra Pradesh	1.044818
Case Group (Measles)	2007	2007h1	Andhra Pradesh	1.029717
Case Group (Measles)	2007	2007h2	Andhra Pradesh	1.597701
Case Group (Measles)	2008	2008h1	Andhra Pradesh	1.318854
Case Group (Measles)	2008	2008h2	Andhra Pradesh	1.672729
Case Group (Measles)	2009	2009h1	Andhra Pradesh	1.156302
Case Group (Measles)	2009	2009h2	Andhra Pradesh	1.205533
Case Group (Measles)	2010	2010h1	Andhra Pradesh	.6877546
Case Group (Measles)	2010	2010h2	Andhra Pradesh	.698855
Case Group (Measles)	2011	2011h1	Andhra Pradesh	.4190761
Case Group (Measles)	2011	2011h2	Andhra Pradesh	.6130355
Case Group (Measles)	2012	2012h1	Andhra Pradesh	.4873553
Case Group (Measles)	2012	2012h2	Andhra Pradesh	.3739549
Case Group (Measles)	2013	2013h1	Andhra Pradesh	.0970817
Case Group (Measles)	2013	2013h2	Andhra Pradesh	0
Case Group (Measles)	2005	2005h1	Karnataka	1.569708
Case Group (Measles)	2005	2005h2	Karnataka	1.322918
Case Group (Measles)	2006	2006h1	Karnataka	2.210779
Case Group (Measles)	2006	2006h2	Karnataka	2.021437
Case Group (Measles)	2007	2007h1	Karnataka	1.684701
Case Group (Measles)	2007	2007h2	Karnataka	1.089691
Case Group (Measles)	2008	2008h1	Karnataka	.5893398
Case Group (Measles)	2008	2008h2	Karnataka	.389406
Case Group (Measles)	2009	2009h1	Karnataka	.3177838
Case Group (Measles)	2009	2009h2	Karnataka	.5873777
Case Group (Measles)	2010	2010h1	Karnataka	.5083063
Case Group (Measles)	2010	2010h2	Karnataka	.6567515
Case Group (Measles)	2011	2011h1	Karnataka	.3667827
Case Group (Measles)	2011	2011h2	Karnataka	.7637623
Case Group (Measles)	2012	2012h1	Karnataka	.7007009
Case Group (Measles)	2012	2012h2	Karnataka	.7007009
Case Group (Measles)	2013	2013h1	Karnataka	.2378134
Case Group (Measles)	2013	2013h2	Karnataka	0
Case Group (Measles)	2005	2005h1	Tamil Nadu	.9045606
Case Group (Measles)	2005	2005h2	Tamil Nadu	.7783154
Case Group (Measles)	2006	2006h1	Tamil Nadu	.4688051
Case Group (Measles)	2006	2006h2	Tamil Nadu	.296052
Case Group (Measles)	2007	2007h1	Tamil Nadu	.381016
Case Group (Measles)	2007	2007h2	Tamil Nadu	.3896088
Case Group (Measles)	2008	2008h1	Tamil Nadu	.2786018
Case Group (Measles)	2008	2008h2	Tamil Nadu	.5098864
Case Group (Measles)	2009	2009h1	Tamil Nadu	.3791882
Case Group (Measles)	2009	2009h2	Tamil Nadu	.6512144
Case Group (Measles)	2010	2010h1	Tamil Nadu	.3871673
Case Group (Measles)	2010	2010h2	Tamil Nadu	.5236126
Case Group (Measles)	2011	2011h1	Tamil Nadu	.3554167
Case Group (Measles)	2011	2011h2	Tamil Nadu	.4272727
Case Group (Measles)	2012	2012h1	Tamil Nadu	.4990538
Case Group (Measles)	2012	2012h2	Tamil Nadu	.3978705
Case Group (Measles)	2013	2013h1	Tamil Nadu	.2040379
Case Group (Measles)	2013	2013h2	Tamil Nadu	0
